# Supplementary material for: Facile synthesis and self-assembly of amphiphilic polydimethylsiloxane with poly(ethylene glycol) moieties via thiol-ene click reaction
Source: Royal Society of Chemistry journal article supplement (doi:10.1039/c5ra10150f), 2015-01-01
Supplement: c5ra10150f1.pdf [file c5ra10150f1.pdf]

# Facile synthesis and self-assembly of amphiphilic polydimethylsiloxane with poly(ethylene glycol) moieties via thiol-ene click reaction

Yong Xia, Hongtao Yao, Zihui Miao, Yun Ma, Meifang Cui, Liqiang Yan, Huanhuan Lin,  
Zhengjian Qi\*

College of Chemistry and Chemical engineering, Southeast University, Nanjing, Jiangsu  
211189, PR China

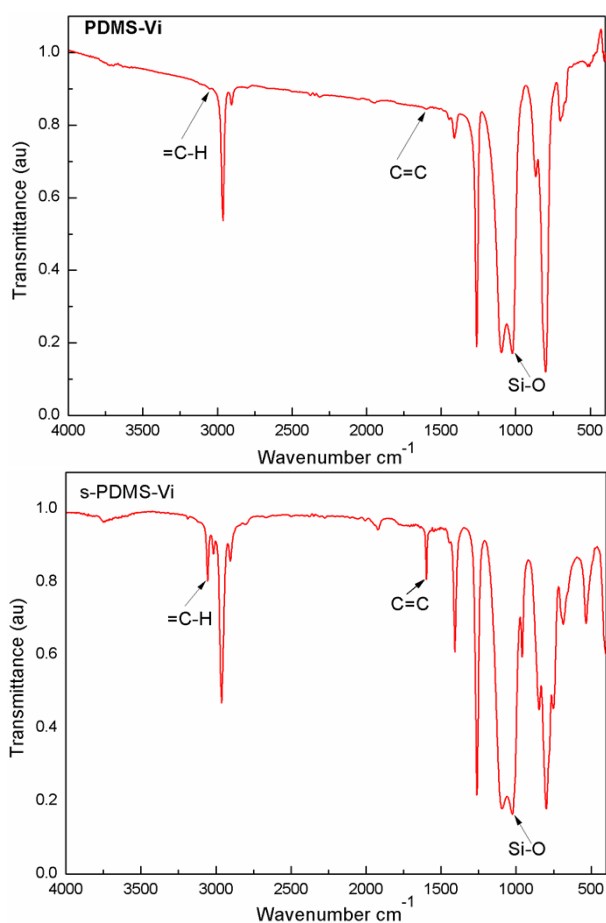

---

Corresponding author: Tel: +86 13605186011; E-mail: qizhengjian@seu.edu.cn

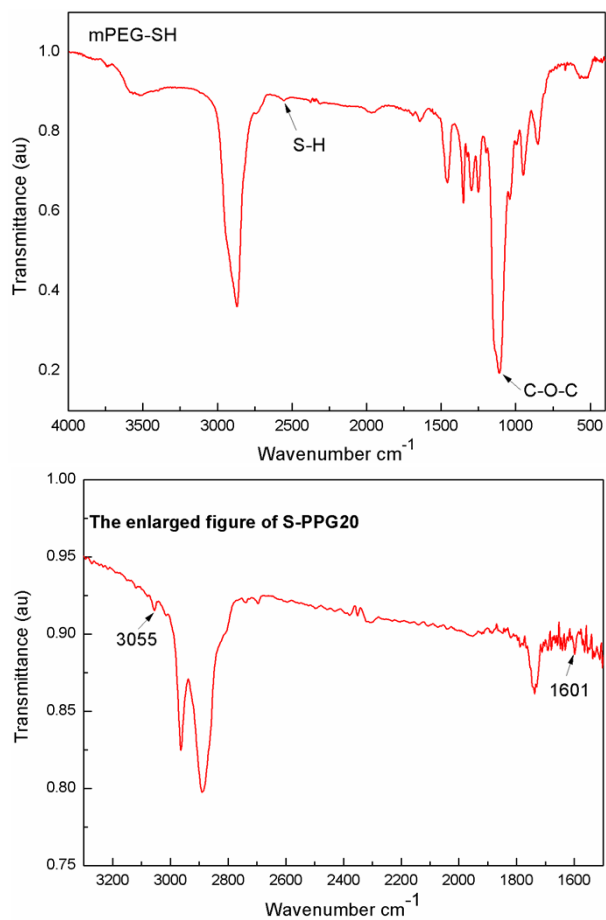

Figure 1S. The FT-IR spectra of PDMS-Vi, sPDMS-Vi, mPEG-SH, and S-PPG20 (enlarged).

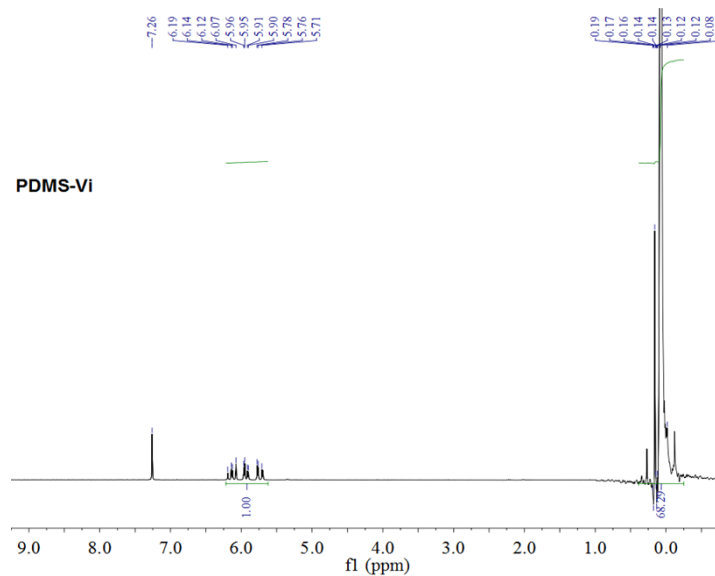

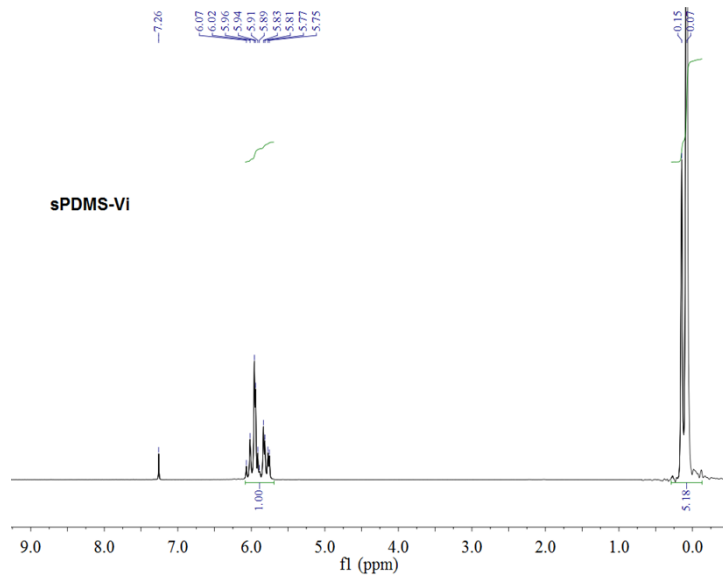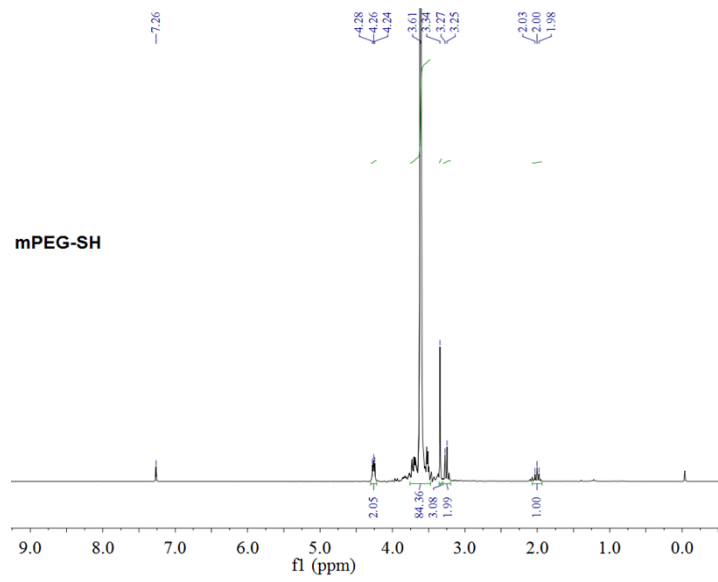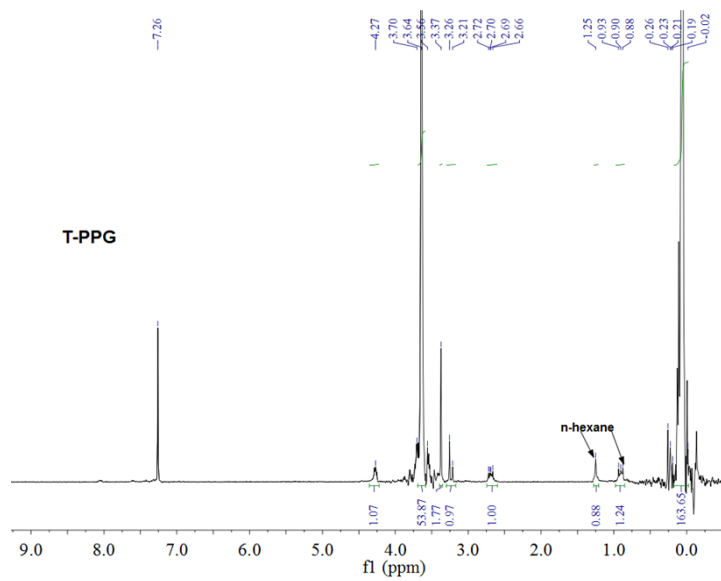

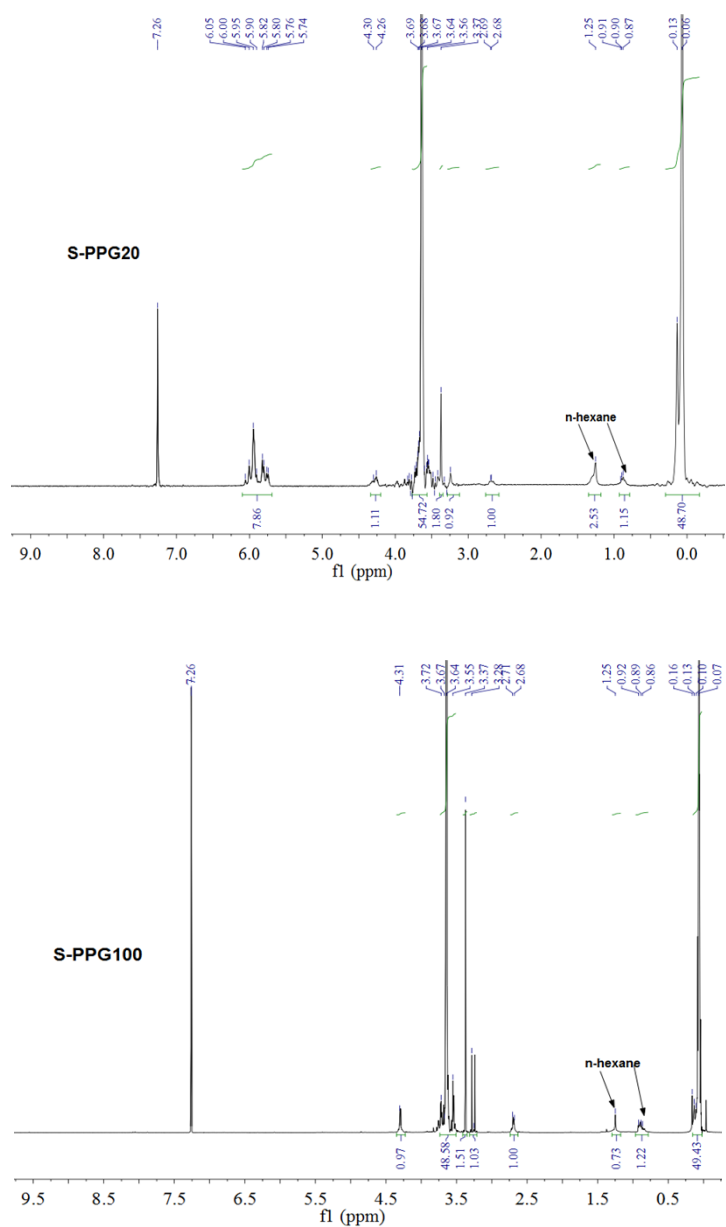

Figure 2S.  $^1\text{H}$  NMR spectra of PDMS-Vi, sPDMS-Vi, mPEG-SH, S-PPG100, S-PPG20, and T-PPG.

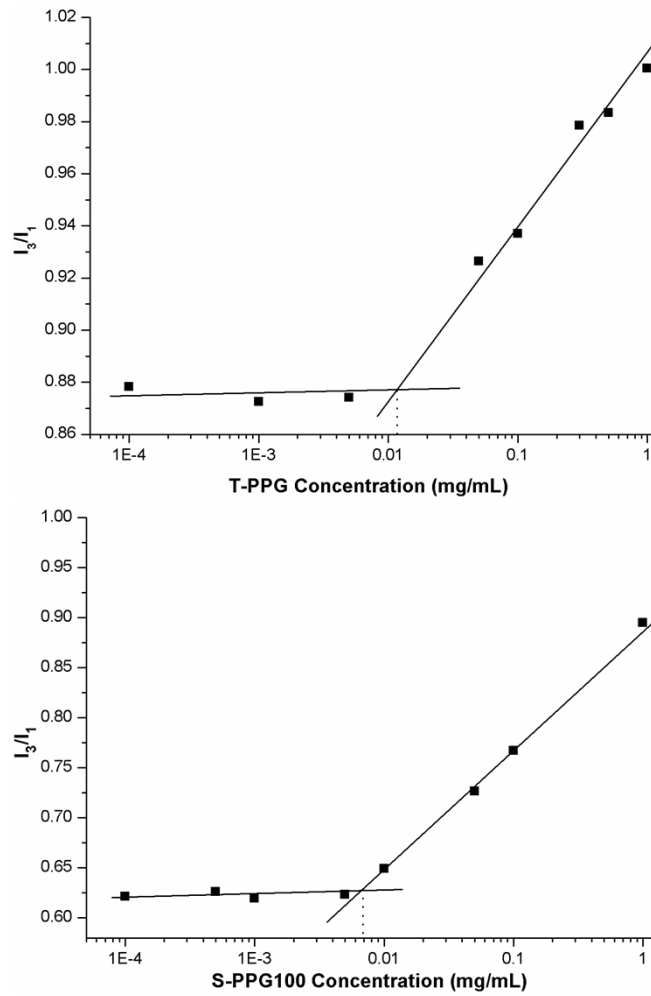

Figure 3S. Variation of the intensity ratio ( $I_3/I_1$ ) as a function of **T-PPG** and **S-PPG100** concentration, the dotted line shows the CAC value.

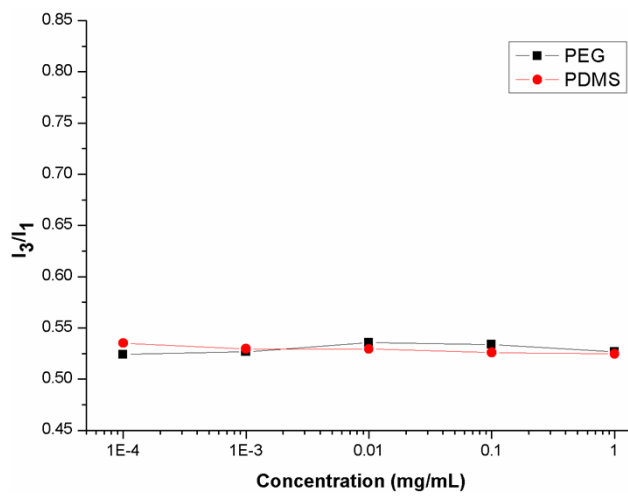

Figure 4S. Variation of the intensity ratio ( $I_3/I_1$ ) as a function of **PDMS** and **PEG** concentration, the dotted line shows the CAC value.

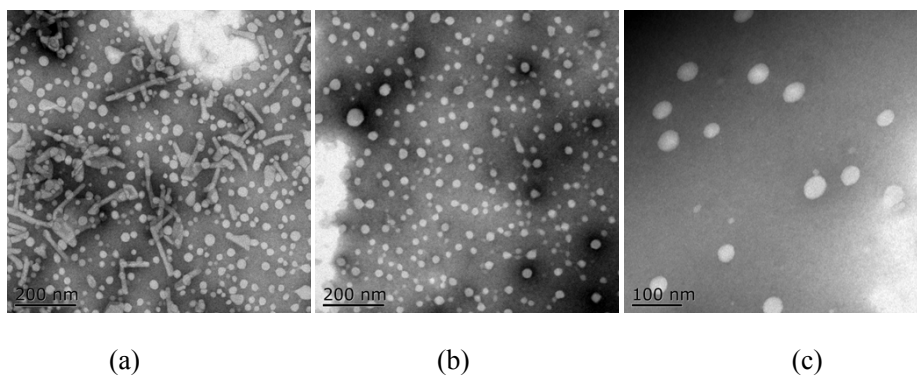

Figure 5S. Typical TEM images of copolymers micelles (1 mg/mL) (a) **T-PPG**, (b) **S-PPG20**, and (c) **S-PPG100**.

Table 1S. The CMC value of the other materials based on pyrene fluorescent probe.

| polymers                                                              | Method of fluorescent probe |
|-----------------------------------------------------------------------|-----------------------------|
|                                                                       | CMC (g/L)                   |
| POSS-PDMAEMA <sup>1</sup>                                             | $2.2 \times 10^{-1}$        |
| PLA <sub>12</sub> -PEG <sub>136</sub> -PLA <sub>12</sub> <sup>2</sup> | $9.0 \times 10^{-2}$        |
| PEG <sub>12</sub> -PCL <sub>23</sub> -PEG <sub>12</sub> <sup>3</sup>  | $7.0 \times 10^{-4}$        |

1. L. Ma, H. P. Geng, J. X. Song, J. Z. Li, G. X. Chen and Q. F. Li, *J Phys Chem B*, 2011, **115**, 10586-10591.
2. Y. Bakkour, V. Darcos, S. M. Li and J. Coudane, *Polym Chem-Uk*, 2012, **3**, 2006-2010.
3. S. S. Payyappilly, S. Dhara and S. Chattopadhyay, *Soft Matter*, 2014, **10**, 2150-2159.
